# Supplementary material
Source: PubMed Central journal article supplement (PMC7025335)
Supplement: ocz189_supplementary_appendix.pdf [file ocz189_supplementary_appendix.pdf]

## **Appendix 1. Symptom report evaluation survey for phase II**

# Neuropathy

- |                 |                                                                                     |                      |
|-----------------|-------------------------------------------------------------------------------------|----------------------|
| <b>April 10</b> |    | Bothered me a lot    |
| <b>April 15</b> |    | Bothered me a little |
| <b>April 23</b> |    | Bothered me          |
| <b>April 27</b> |   | Did not bother me    |
| <b>April 31</b> |  | Bothered me          |
| <b>May 5</b>    |  | Bothered me a lot    |
| <b>May 10</b>   |  | Did not bother me    |
| <b>May 17</b>   |  | Did not bother me    |

**When you look at this report, what symptom do you think it is telling you about?**

- Depression
- Neuropathy
- I am not sure

**On what day did this symptom bother you a little?**

- April 23
- April 15
- April 31

**Great, thank you. Now tell me, what were you looking at when you made that choice?**

**And how much did this symptom bother you on May 5?**

- It did not bother me
- It bothered me
- It bothered me a lot

**Did this symptom bother you more on April 31 or May 5?**

- April 31
- May 5
- It bothered me the same both days

**Perfect. Now can you tell me what you were thinking about or looking at on the graph when you made those choices? Do you have any questions so far?**

**Now we are going to look at the next image**

# Shortness of breath

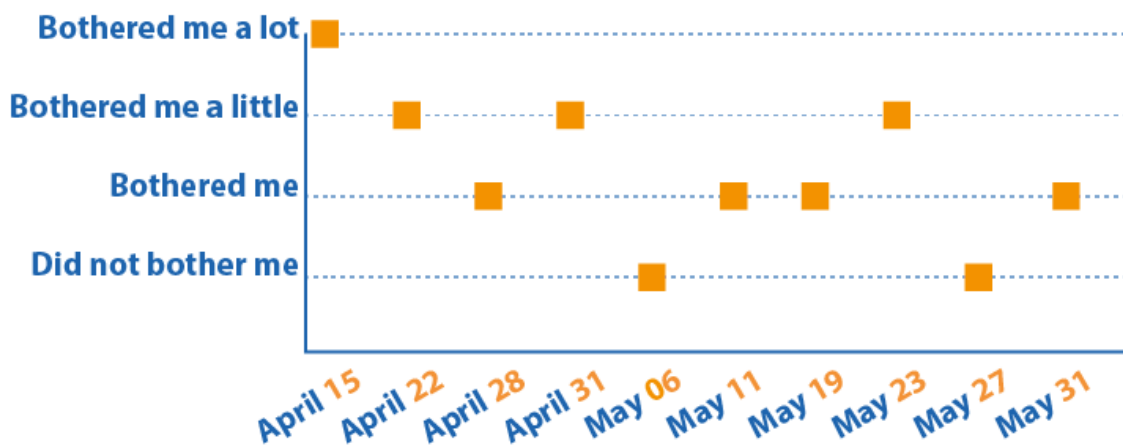

What is the first thing that comes to mind when you look at this image?

Now, in this report, on what two days did this symptom NOT bother you?

- April 22 and May 23
- May 06 and May 27
- I am not sure

And in this report, what day did this symptom bother you the MOST?

- April 15
- May 27
- I am not sure

Great! Thank you. Now just like before, can you tell me what you were looking at when you made those choices?

How much did this symptom bother you on April 28?

- It bothered me a little
- It bothered me
- I am not sure

Ok great. Now here is the next image.

## Difficulty staying asleep

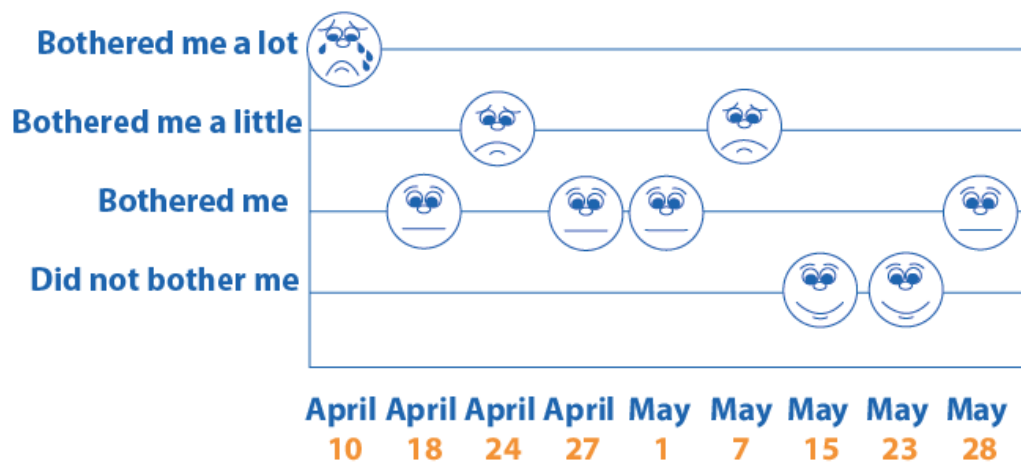

What do you notice when you look at this graph? (probe as needed for clarity)

What symptom do you think this graph is telling you about?

- My overall mood
- My pain
- My difficulty staying asleep

**On what days did this symptom bother you a little?**

- May 1 and May 7
- April 24 and May 7
- I am not sure

**Now, notice that the dates in this one are written straight across whereas the ones in the last report were slanted. Do you prefer the dates written straight across or slanted?**

- I like them straight across
- I like them slanted
- It does not really matter

**On what days did this symptom not bother you?**

- May 15 and May 23
- May 1 and May 7
- I am not sure

**Excellent. Now could you please tell me again what you were thinking about when you answered those questions?**

**Compared to the question before with the squares, did you think the faces made it easier or harder to read this report?**

- The faces made it easier
- The faces made it harder
- It doesn't really matter either way

**Now we have another set of images. Take a look at this one.**

# Difficulty concentrating

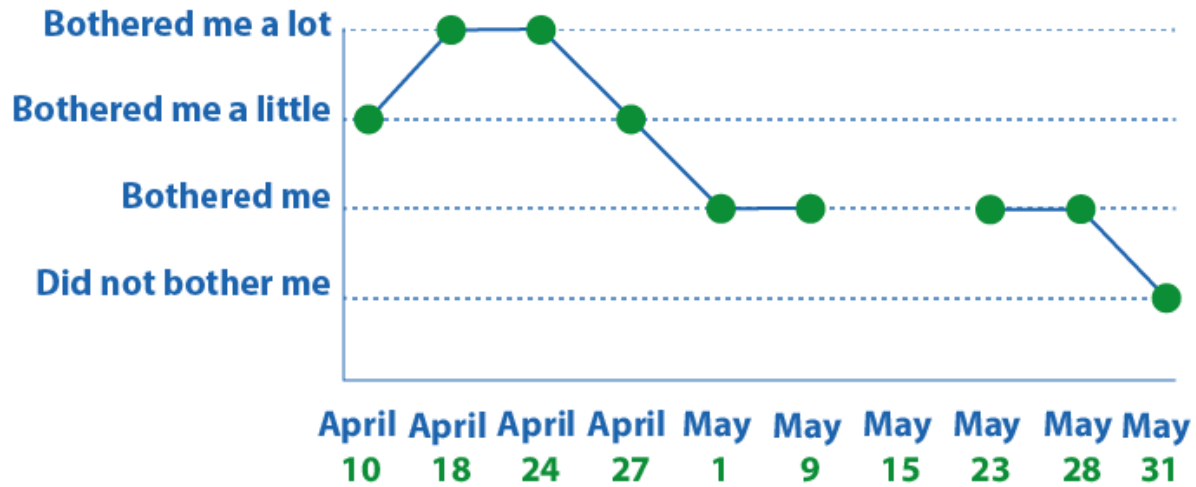

On what days did this symptom bother you a little?

- April 18 and April 24
- April 10 and April 27
- May 1 and May 9

Did this symptom bother you more on April 18 or on May 1?

- On April 18 it bothered me more
- On May 1 it bothered me more
- I am not sure

In general, did this symptom get better or worse over time?

- It bothered me more over time
- It bothered me less over time
- I am not sure

Great. Now can you tell me what you think about this report? What do you like the most about it? What do you like the least about it?

Now here is the next report.

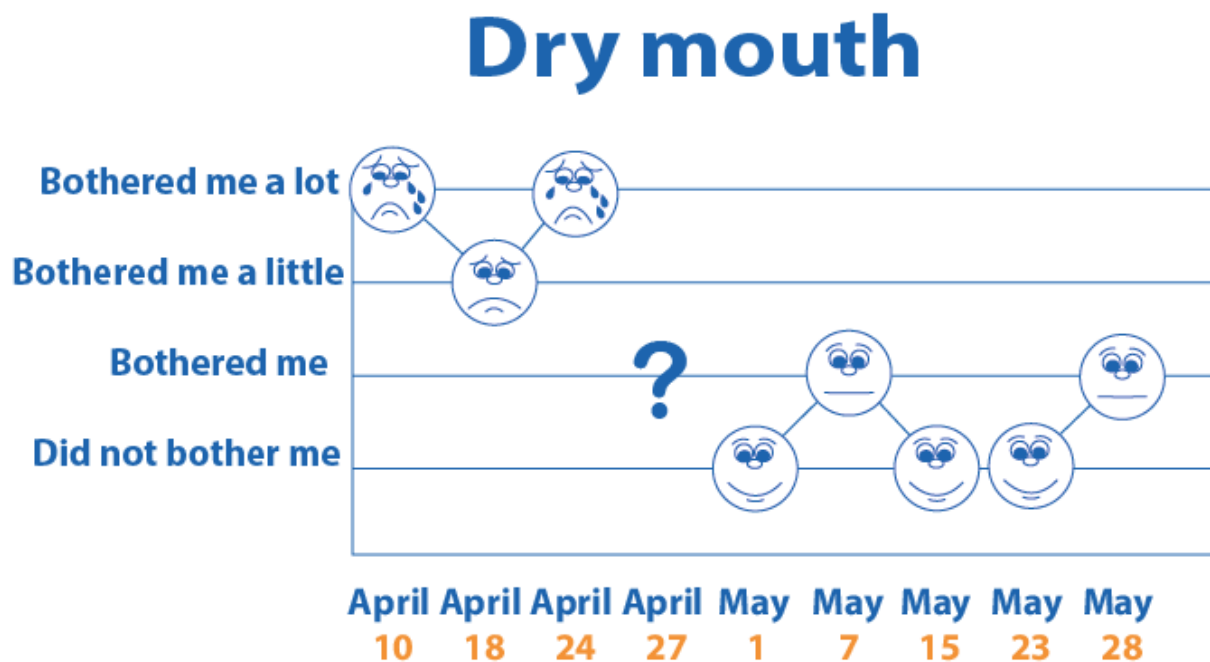

When you look at this report, what are some of the first things that you notice?

Great. Now tell me what symptom is this report providing information on?

- Depression
- Dry mouth
- Pain

And what do you think happened on April 27?

- I did not report that symptom
- I did not complete a session in the app
- I am not sure



On what day did this symptom bother you a little?

- April 24
- April 18
- May 7

Did this symptom bother you more in April or in May?

- April
- May
- I am not sure

Great. Thank you, now can you tell me what you were thinking about or what you were looking at when you were answering those questions?

Now here is another report.

## Muscle aches and pains

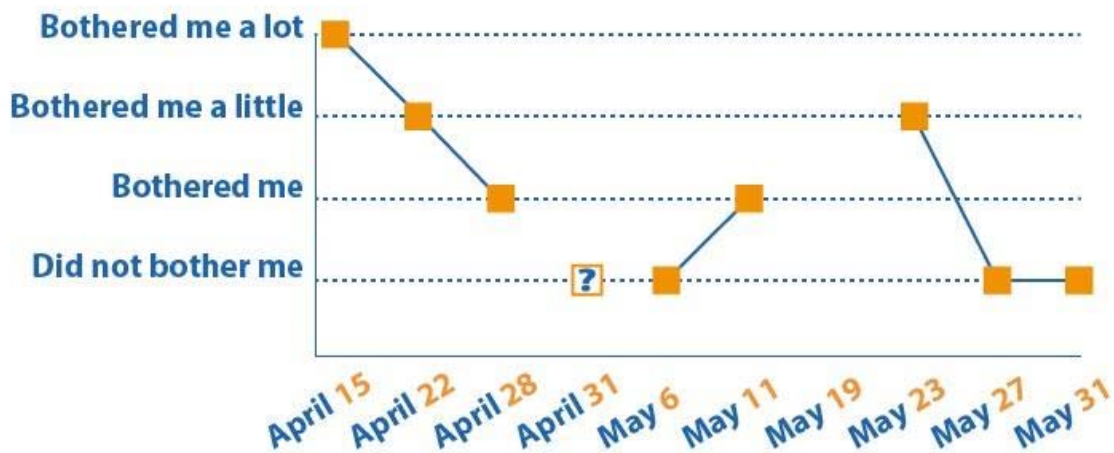

**What is the first thing that you think about when you see this report?**

**And when you look at this report, is the following statement true or false: "On May 6, this symptom bothered me less than on April 15"**

- True, this symptom bothered me less on May 6 than on April 15
- False, this symptom did not bother me less on May 6 than it did on April 15
- I am not sure

**On what two days did this symptom bother you a little?**

- April 28 and May 11
- April 22 and May 23
- May 11 and May 23

**Great, and what parts of the report were you looking at when you answered those questions?**

**What happened on April 31?**

- I did not report that symptom
- I did not complete a session in the app
- I am not sure

**We just saw similar reports, one with green dots, one with emoji faces and one with orange squares. Which of these images do you think is the easiest to read?**

- The one with the green circles is the easiest to read
- The one with the emoji faces is the easiest to read
- The one with the orange squares is the easiest to read

And of those two reports, the one with green dots, the one with emoji faces, and the one with orange squares, which one would you prefer to have as the symptom report at the end of the app?

- The one with green circles
- The one with emoji faces
- The one with orange squares

I like that format too. Can you tell me why that is the one you would prefer?

Now we are going to move into our last set of symptom reports. Here is the next one for you to take a look at.

## Changes in appetite

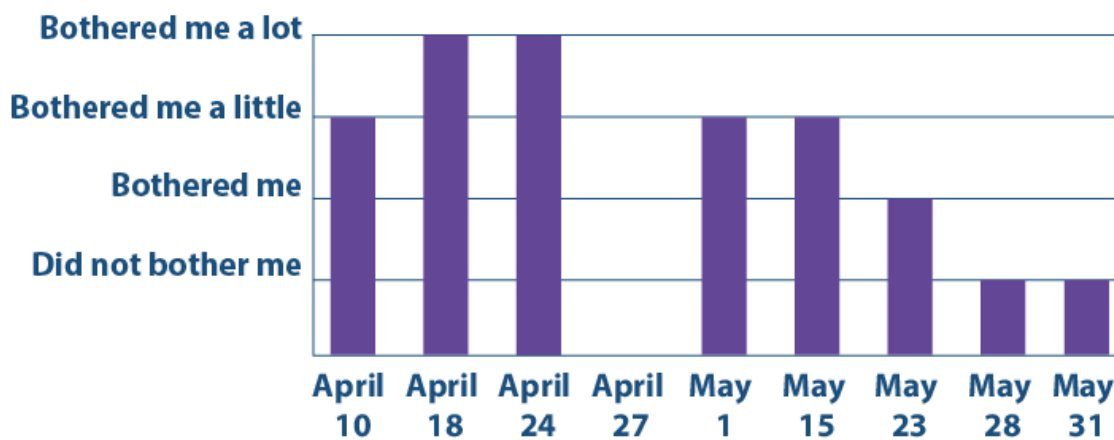

Did this symptom bother you more on May 1 or May 15?

- It bothered me more on May 1
- It bothered me more on May 15
- It bothered me a little on both days

True or false: According to this report, this symptom has gradually bothered me less over time.

- True
- False
- I am not sure

On what days did this symptom not bother you

- May 1 and May 15
- May 23 and May 28
- May 28 and May 31

Great. Thank you. Now what parts of this graph were you looking at when you picked those answers?

Here is the next report.

## Constipation

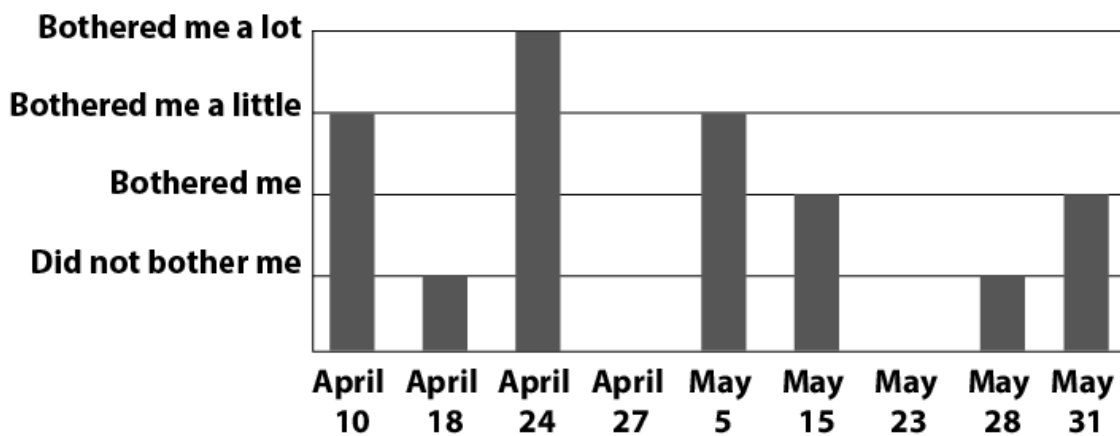

**Was this symptom worse on April 10 or on May 15?**

- April 10
- May 15
- I am not sure

**On what day did this symptom bother you the LEAST?**

- April 24
- April 27
- May 28

**On what day did this symptom bother you the MOST?**

- April 10
- April 18
- April 24

**Between April 24 and May 28, did this symptom get better, as in it did it bother you less on May 28 than April 24?**

- Yes, the symptom bothered me less on May 28
- No, the symptom bothered me more on May 24
- It bothered me about the same amount on both days

**Thank you for answering all of those questions. Did you notice anything about this report that weren't on the other reports? Are there any characteristics that you like more or less about this one?**

**And now this is the last report.**

# Anxiety

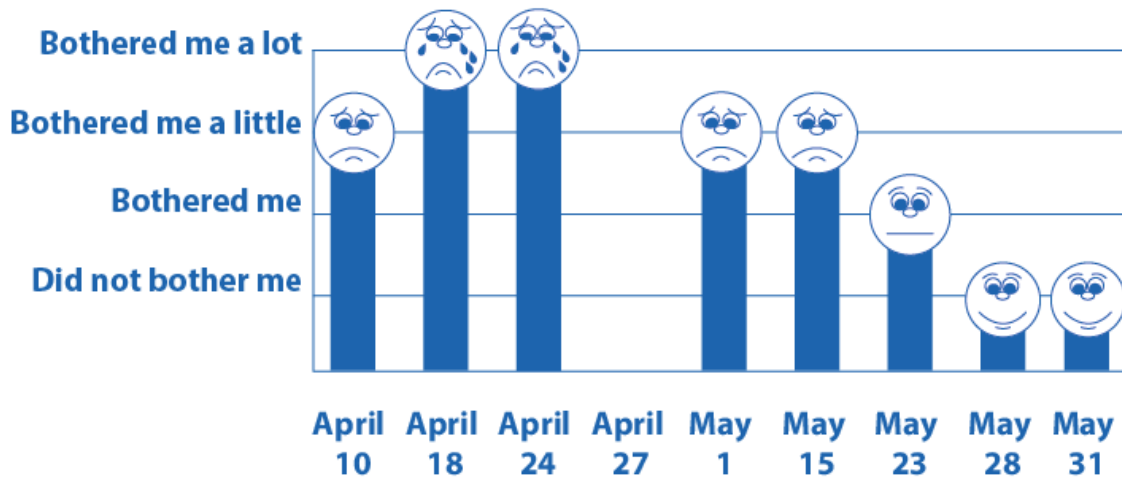

Now tell me, is this statement true or false. "My anxiety bothered me the same amount on May 15 and May 23".

- True
- False
- I am not sure

On what days did this symptom not bother you?

- May 15 and May 23
- May 28 and May 31
- I am not sure

On what days did this symptom bother you the most?

- April 18 and April 24
- April 24 and April 27
- I am not sure

**Did this symptom bother you more on April 10 or on May 23?**

- It bothered me more on April 10
- It bothered me more on May 23
- There was not a difference between those two days

**Thank you for answering all of those questions. Now, can you tell me what you notice different about this report? Was there anything in it that made it easier or harder to read?**

**Now between these last three graphs, there was one in color, one in black and white, and one with smiley faces. If you had to choose just one to be the way you see the symptoms that you report in the app, which one would you pick.**

- The first one that is in color
- The second one that is in black and white
- The third one with the smiley faces

**Excellent choice. Now, can you tell me a little bit about why you picked that one?**

**In a few of the images, there were question marks or blank spaces. (Interviewer - please show Constipation, Dry Mouth, Muscle Aches and Pains, and Difficulty Concentrating)**

**If we want to show days that you did not complete a session in the app, would you prefer the question mark like the one in Dry Mouth, the question mark in Muscle Aches and Pains or the blank spaces such as in Difficulty Concentrating or Constipation?**

- Question mark in Dry Mouth
- Question mark in Muscle Aches and Pains
- Blank spaces in Difficulty Concentrating or Constipation

**That makes sense. Why is that the one you prefer? Can you think of any other way that we might be able to show the days you did not complete a session in the app?**

**Now, between all of the images that we have just seen (interviewer please show the printouts of all of the images), which one would you pick to be in the VIP HANA app?**

- Neuropathy
- Shortness of breath
- Difficulty staying asleep
- Difficulty concentrating
- Dry mouth
- Muscle aches and pains
- Changes in appetite
- Constipation
- Anxiety

**Great! Can you tell me why this is the one that you like the best?**

**Now, if you were using the app and had these reports of how much your symptom had bothered you in the last few months, do you think you would show these reports to your doctor or health care provider?**

- Yes, I would show them to my doctor or provider
- No, I would not show them to my doctor or provider
- I am not sure if I would or not

**Totally makes sense. Can you tell me why that is the option you chose?**

## Demographics

**Thank you for walking through all of those questions with me. Now I am going to sit back while you answer a few more questions about yourself. I will still be here if you have any questions.**

**User ID**
